# Supplementary material for: Spectroscopic identification of monomeric methyl metaphosphate
Source: Royal Society of Chemistry journal article supplement (doi:10.1039/c9dt03367j), 2019-01-01
Supplement: c9dt03367j1.pdf [file c9dt03367j1.pdf]

## Supporting Information

### Spectroscopic Identification of Monomeric Methyl Metaphosphate

Xiaofang Zhao,<sup>a†</sup> Chao Song,<sup>a†</sup> Kemiao Hong,<sup>a</sup> Xinfang Xu,<sup>a</sup> Changyun Chen,<sup>a</sup>  
Xianxu Chu,<sup>a</sup> and Xiaoqing Zeng<sup>a,b\*</sup>

<sup>a</sup> College of Chemistry, Chemical Engineering and Materials Science,  
Soochow University, Suzhou 215123 China. E-mail: xqzeng@suda.edu.cn

<sup>b</sup> Department of Chemistry, Fudan University, Shanghai 200433 China. E-mail:  
xqzeng@fudan.edu.cn

## Table of Contents:

|                                                                                                             |     |
|-------------------------------------------------------------------------------------------------------------|-----|
| Experimental and computational details.....                                                                 | S3  |
| Matrix-isolation IR spectra (Figures S1-S2).....                                                            | S5  |
| Calculated potential energy profile for the oxidation of CH <sub>3</sub> PO.....                            | S7  |
| Computed IR data for cyclic CH <sub>3</sub> P(=O)(O <sub>2</sub> ) and acyclic CH <sub>3</sub> P(=O)OO..... | S8  |
| Computed IR data for CH <sub>3</sub> OPO <sub>2</sub> .....                                                 | S9  |
| Computed vertical transitions for CH <sub>3</sub> OPO <sub>2</sub> isomers.....                             | S10 |
| References.....                                                                                             | S11 |
| Computed energies and atomic coordinates for optimized structures.....                                      | S12 |

## Experimental details

**Caution!** Covalent azides are potentially hazardous explosive. Although we have not experienced any incident during this work, safety precautions (face shields, leather gloves, and protective leather clothing) are recommended for handling  $\text{CH}_3\text{P}(\text{O})(\text{N}_3)_2$ .

**Sample preparation.** Methylphosphoryl diazide<sup>[1]</sup> and methyl 2-butenylphosphonate<sup>[2]</sup> were prepared and purified according to the published protocols. Ar ( $\geq 99.999\%$ , Messer),  $\text{N}_2$  ( $\geq 99.999\%$ , Messer), Ne ( $\geq 99.999\%$ , Messer), and  $\text{O}_2$  ( $\geq 99.999\%$ , Messer) gases were used without further purification. For the labeling experiments,  $^{18}\text{O}_2$  (97 atom %, Aldrich) was used.

## Matrix IR spectra

Matrix IR spectra were recorded on a FT-IR spectrometer (Bruker 70V) in a reflectance mode using a transfer optic. A KBr beam splitter and wide band MCT detector were used in the mid-IR region ( $4000\text{--}400\text{ cm}^{-1}$ ). For each spectrum, 200 scans at a resolution of  $0.5\text{ cm}^{-1}$  were co-added. The gaseous sample was mixed by passing a flow of dilution gas ( $\text{N}_2$ , Ar or Ne) through a U-trap ( $\text{CH}_3\text{P}(\text{O})(\text{N}_3)_2$ :  $-17\text{ }^\circ\text{C}$ , methyl 2-butenylphosphonate:  $60\text{ }^\circ\text{C}$ ) containing ca. 10 mg of the sample. Then the mixture (diazide :  $\text{O}_2$  : inert gas, estimated ratio of 1:50:1000; methyl 2-butenylphosphonate : inert gas, estimated ratio of 1:1000) was passed through an aluminum oxide furnace (o.d. 2.0 mm, i.d. 1.0 mm), which can be heated over a length of ca. 25 mm by a tantalum wire (o.d. 0.4 mm, resistance  $0.4\ \Omega$ ) and immediately deposited ( $2\text{ mmol h}^{-1}$ ) onto the Rh-plated copper block matrix support ( $\text{N}_2$ : 15 K, Ar: 10 K, Ne: 3 K) in a high vacuum ( $\sim 10^{-6}\text{ Pa}$ ). While not directly measured, the expected residence time of the mixture in the pyrolysis tube is about a few milliseconds, and the pressure inside the pyrolysis tube is about 10 mbar. The electric power (voltage/current) used in the pyrolysis experiments was 5.4 V/3.6 A. Photolysis experiments were performed using an ArF excimer laser (Gamlaser EX5/250, 5 mJ, 3Hz), a

Nd<sup>3+</sup>:YAG laser (MPL-F-266, 10 mW), and an UV flashlight (Boyu T648, 30 W).

### **Quantum chemical calculations**

Structures, IR frequencies and energies were calculated using the DFT-B3LYP<sup>[3]</sup> method with the 6-311++G(3df,3pd)<sup>[4]</sup> basis set. The natural population analysis (NPA) charges were calculated with the NBO 7.0 program.<sup>[5]</sup> Structures, IR frequencies, energies and the molecular electrostatic potential maps were performed using Gaussian 09 software package.<sup>[6]</sup>

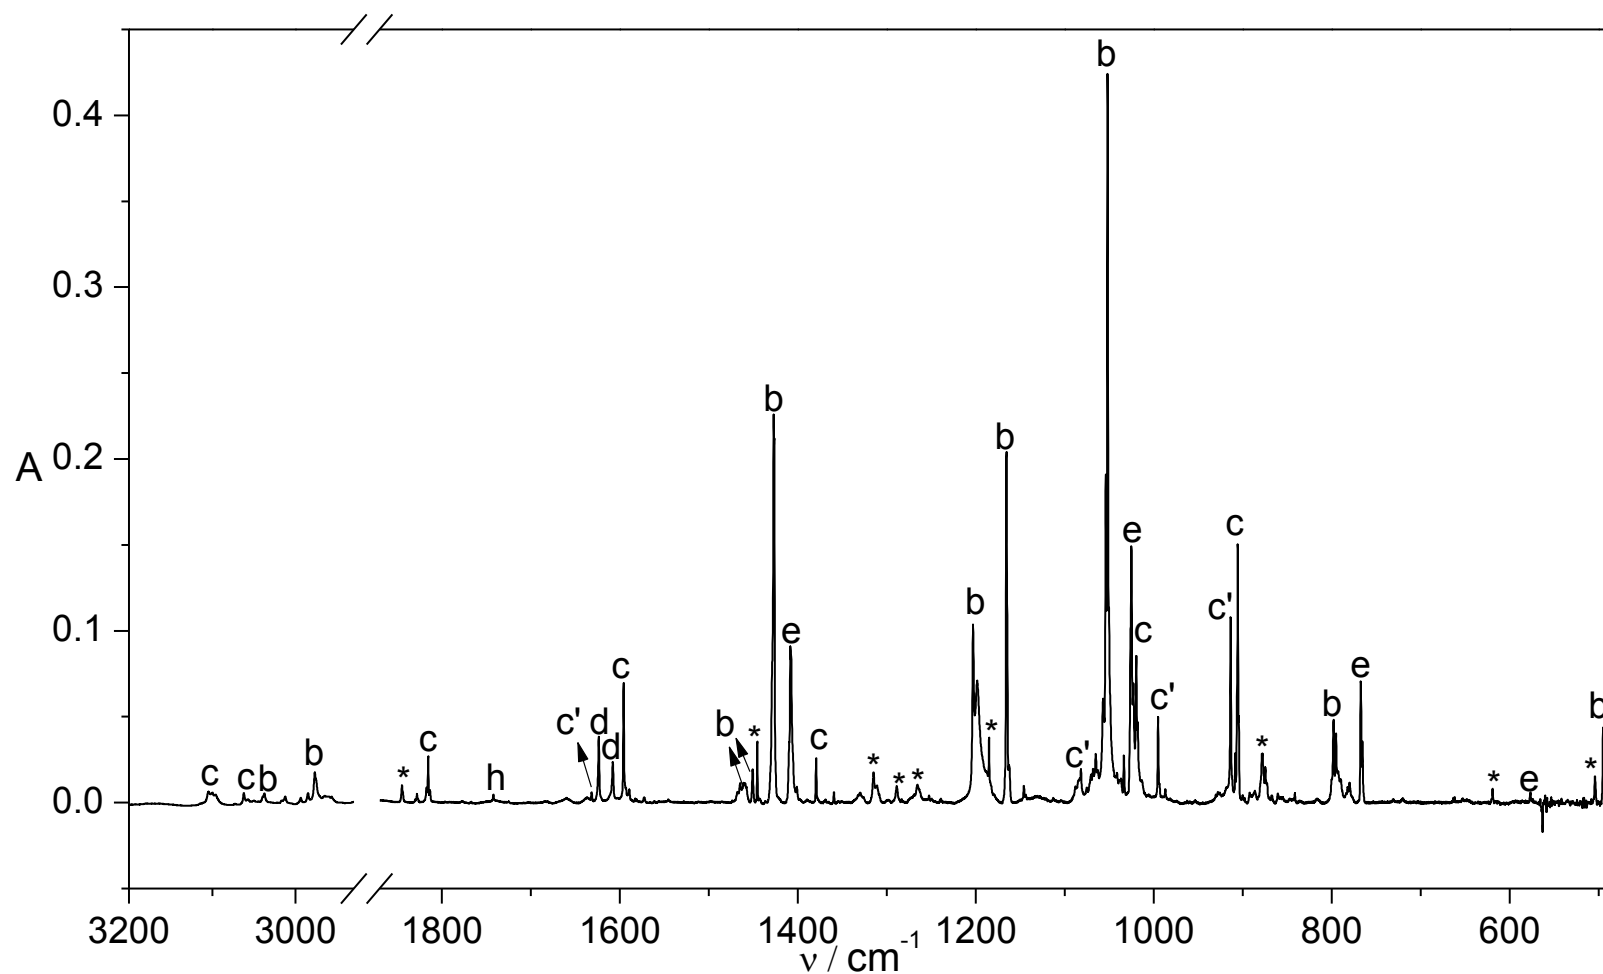

**Figure S1.** IR spectrum (3200-480  $\text{cm}^{-1}$ ) of Ar-matrix isolated high-vacuum flash pyrolysis (HVFP, ca. 1000 K) products of methyl 2-butenylphosphonate at 10 K. The IR bands of  $\text{CH}_3\text{OPO}_2$  (b), 1,3-butadiene (*trans*: c; *gauche*: c'),  $\text{H}_2\text{O}$  (d),  $\text{P}_4\text{O}_{10}$  (e),  $\text{H}_2\text{CO}$  (h) and unknown species (\*) are labeled.

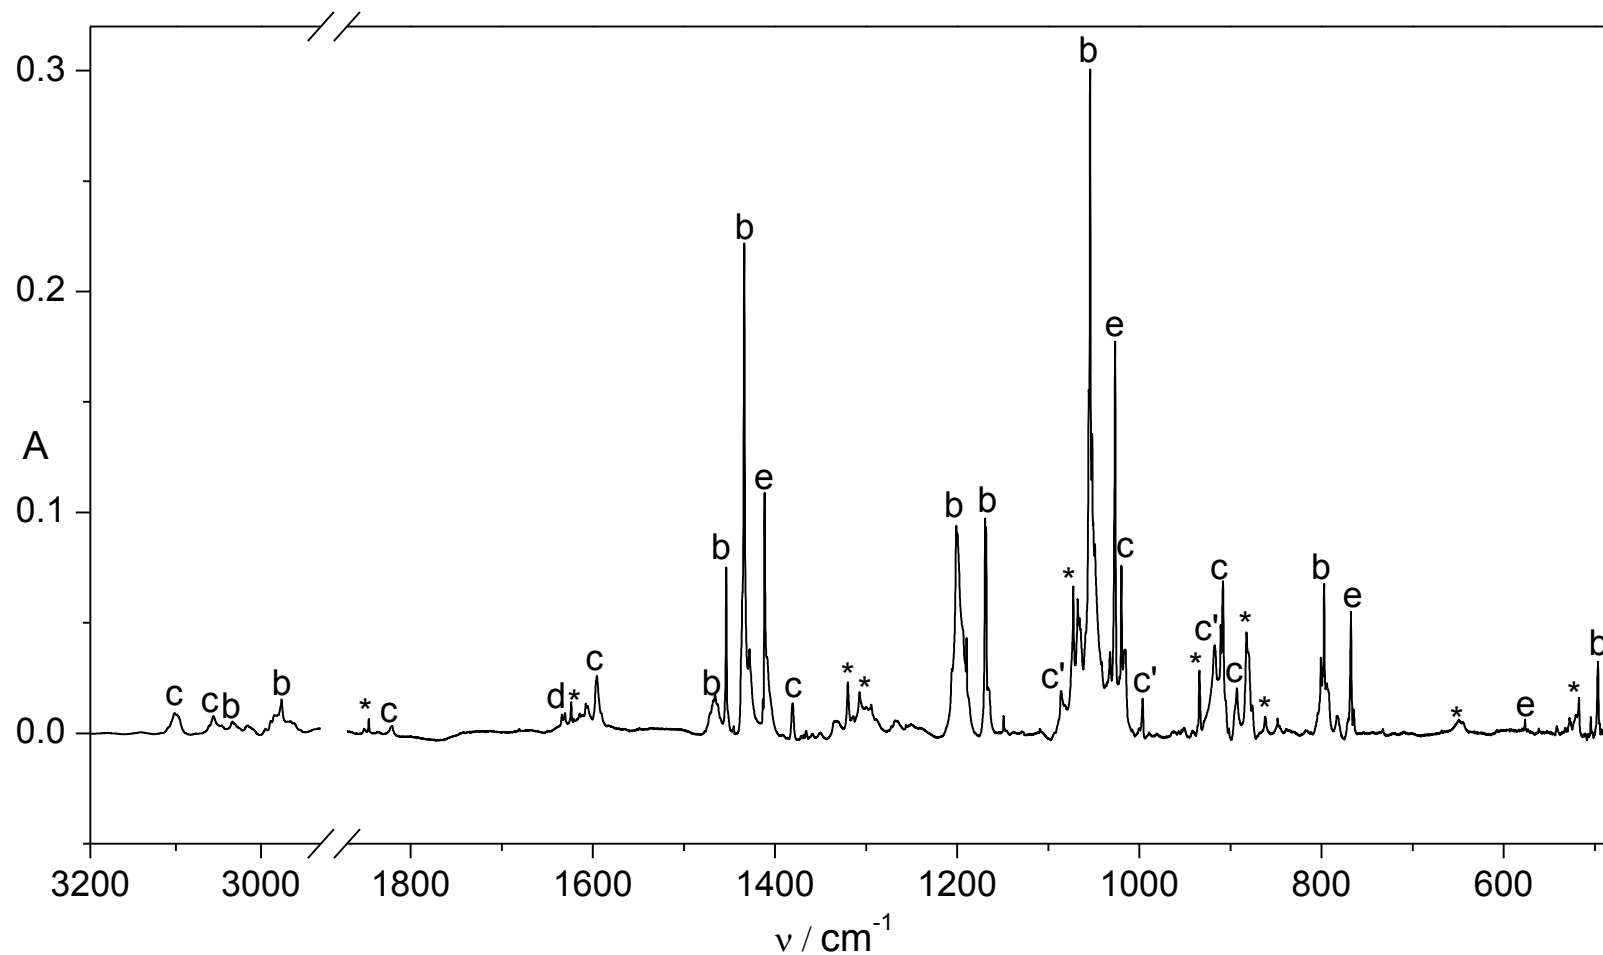

**Figure S2.** IR spectrum (3200-480  $\text{cm}^{-1}$ ) of Ne-matrix isolated high-vacuum flash pyrolysis (HVFP, ca. 1000 K) products of methyl 2-butenylphosphonate at 3 K. The IR bands of  $\text{CH}_3\text{OPO}_2$  (b), 1,3-butadiene (*trans*: c; *gauche*: c'),  $\text{H}_2\text{O}$  (d),  $\text{P}_4\text{O}_{10}$  (e) and unknown species (\*) are labeled.

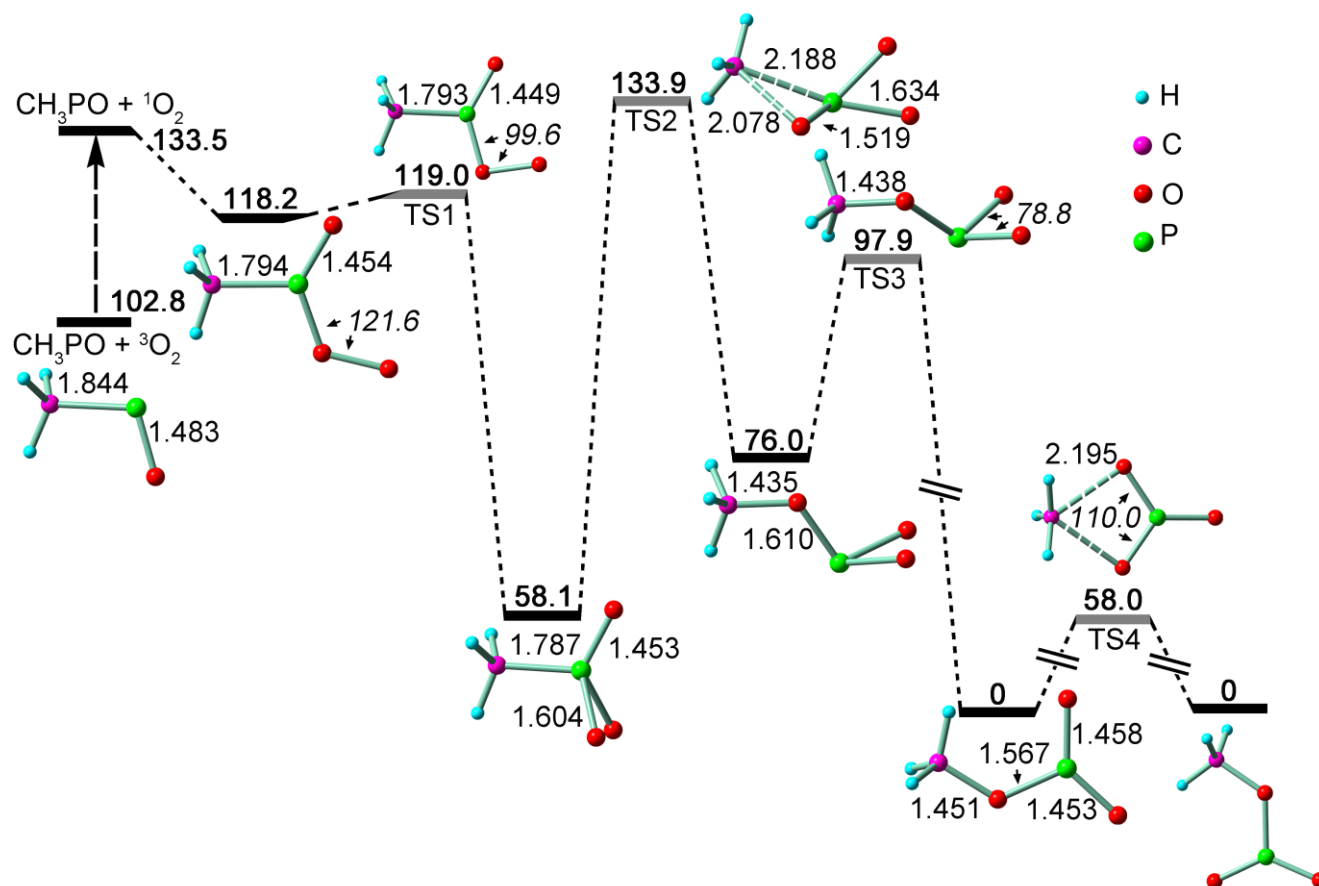

**Figure S3.** Calculated potential energy profile ( $\Delta G$  in kcal mol<sup>-1</sup>) for the oxidation of CH<sub>3</sub>PO by O<sub>2</sub> at CCSD(T)/aug-cc-pVTZ//B3LYP/6-311++G(3df,3pd) level. The calculated bond lengths (Å), bond angles (°, italics) at B3LYP/6-311++G(3df,3pd) level and relative energies (bold) are given.

**Table S1.** Computed IR frequencies ( $\text{cm}^{-1}$ ) and intensity ( $\text{km mol}^{-1}$ , in parentheses) of cyclic  $\text{CH}_3\text{P}(=\text{O})(\text{O}_2)$  and acyclic  $\text{CH}_3\text{P}(=\text{O})\text{OO}$  at the B3LYP/6-311++G(3df,3pd) level.

| cyclic $\text{CH}_3\text{P}(=\text{O})(\text{O}_2)$ | <i>cis</i> - $\text{CH}_3\text{P}(=\text{O})\text{OO}$ | <i>trans</i> - $\text{CH}_3\text{P}(=\text{O})\text{OO}$ |
|-----------------------------------------------------|--------------------------------------------------------|----------------------------------------------------------|
| 3162.3 (< 1)                                        | 3169.3 (3)                                             | 3170.8 (6)                                               |
| 3130.9 (< 1)                                        | 3125.7 (2)                                             | 3121.1 (7)                                               |
| 3057.3 (< 1)                                        | 3052.1 (2)                                             | 3050.0 (12)                                              |
| 1458.1 (2)                                          | 1452.1 (3)                                             | 1422.6 (1)                                               |
| 1456.1 (7)                                          | 1443.1 (11)                                            | 1409.8 (13)                                              |
| 1371.2 (200)                                        | 1369.9 (145)                                           | 1357.4 (188)                                             |
| 1343.5 (27)                                         | 1327.7 (1)                                             | 1315.2 (10)                                              |
| 1023.3 (101)                                        | 969.8 (14)                                             | 1016.0 (53)                                              |
| 920.1 (5)                                           | 900.4 (19)                                             | 915.6 (3)                                                |
| 902.2 (14)                                          | 876.1 (3)                                              | 851.5 (8)                                                |
| 773.7 (12)                                          | 755.7 (88)                                             | 711.0 (29)                                               |
| 761.6 (45)                                          | 709.5 (16)                                             | 693.5 (12)                                               |
| 631.6 (20)                                          | 445.9 (29)                                             | 384.6 (33)                                               |
| 410.3 (50)                                          | 309.7 (8)                                              | 291.0 (1)                                                |
| 370.1 (19)                                          | 272.8 (< 1)                                            | 271.7 (9)                                                |
| 291.1 (< 1)                                         | 150.7 (8)                                              | 237.1 (22)                                               |
| 254.9 (< 1)                                         | 133.9 (4)                                              | 194.9 (10)                                               |
| 128.3 (< 1)                                         | 38.9 (2)                                               | 94.8 (5)                                                 |



**Table S2.** Computed IR data of CH<sub>3</sub>OPO<sub>2</sub> at the B3LYP/6-311++G(3df,3pd) level.

| $V_{\text{calcd}}^{[a]}$                                         |                                                                                               |                                                                                              |                                                                                               | $\Delta V^{[b]}$ | $\Delta V^{[c]}$ | $\Delta V^{[d]}$ |
|------------------------------------------------------------------|-----------------------------------------------------------------------------------------------|----------------------------------------------------------------------------------------------|-----------------------------------------------------------------------------------------------|------------------|------------------|------------------|
| CH <sub>3</sub> O <sub>α</sub> P(O <sub>β</sub> O <sub>γ</sub> ) | CH <sub>3</sub> <sup>18</sup> O <sub>α</sub> P( <sup>18</sup> O <sub>β</sub> O <sub>γ</sub> ) | CH <sub>3</sub> <sup>18</sup> O <sub>α</sub> P(O <sub>β</sub> <sup>18</sup> O <sub>γ</sub> ) | CH <sub>3</sub> O <sub>α</sub> P( <sup>18</sup> O <sub>β</sub> <sup>18</sup> O <sub>γ</sub> ) |                  |                  |                  |
| 3164.0 (1)                                                       | 3164.0 (1)                                                                                    | 3164.0 (1)                                                                                   | 3164.0 (1)                                                                                    | 0                | 0                | 0                |
| 3153.2 (8)                                                       | 3153.2 (8)                                                                                    | 3153.2 (8)                                                                                   | 3153.2 (8)                                                                                    | 0                | 0                | 0                |
| 3066.0 (29)                                                      | 3065.9 (29)                                                                                   | 3066.0 (29)                                                                                  | 3066.0 (29)                                                                                   | < 0.5            | 0                | 0                |
| 1500.3 (7)                                                       | 1499.9 (7)                                                                                    | 1499.8 (7)                                                                                   | 1500.2 (8)                                                                                    | < 0.5            | 0.5              | < 0.5            |
| 1499.2 (7)                                                       | 1499.1 (7)                                                                                    | 1499.1 (7)                                                                                   | 1499.2 (7)                                                                                    | < 0.5            | < 0.5            | 0                |
| 1479.5 (4)                                                       | 1476.0 (1)                                                                                    | 1476.8 (2)                                                                                   | 1478.1 (< 1)                                                                                  | 3.5              | 2.7              | 1.4              |
| 1443.3 (191)                                                     | 1427.4 (190)                                                                                  | 1421.8 (183)                                                                                 | 1402.2 (186)                                                                                  | 15.9             | 21.5             | 41.1             |
| 1215.5 (119)                                                     | 1202.1 (49)                                                                                   | 1202.2 (54)                                                                                  | 1211.5 (72)                                                                                   | 13.4             | 13.3             | 4.0              |
| 1179.6 (< 1)                                                     | 1177.0 (< 1)                                                                                  | 1177.0 (< 1)                                                                                 | 1179.6 (< 1)                                                                                  | 2.6              | 2.6              | 0                |
| 1175.9 (122)                                                     | 1151.9 (175)                                                                                  | 1156.6 (180)                                                                                 | 1140.6 (236)                                                                                  | 24.0             | 19.3             | 35.3             |
| 1061.6 (173)                                                     | 1025.4 (171)                                                                                  | 1024.6 (165)                                                                                 | 1050.8 (108)                                                                                  | 36.2             | 37.0             | 10.8             |
| 787.4 (45)                                                       | 767.7 (43)                                                                                    | 768.6 (44)                                                                                   | 779.9 (40)                                                                                    | 19.7             | 18.8             | 7.5              |
| 493.0 (14)                                                       | 476.7 (11)                                                                                    | 480.8 (14)                                                                                   | 482.7 (11)                                                                                    | 16.3             | 12.2             | 10.3             |
| 435.7 (50)                                                       | 429.6 (48)                                                                                    | 430.0 (48)                                                                                   | 428.1 (47)                                                                                    | 6.1              | 5.7              | 7.6              |
| 419.9 (45)                                                       | 413.2 (43)                                                                                    | 406.7 (42)                                                                                   | 404.4 (43)                                                                                    | 6.7              | 13.2             | 15.5             |
| 234.9 (6)                                                        | 230.0 (6)                                                                                     | 232.6 (5)                                                                                    | 229.3 (5)                                                                                     | 4.9              | 2.3              | 5.6              |
| 145.1 (1)                                                        | 141.3 (1)                                                                                     | 139.7 (1)                                                                                    | 143.3 (1)                                                                                     | 3.8              | 5.4              | 1.8              |
| 20.0 (< 1)                                                       | 19.3 (< 1)                                                                                    | 20.0 (< 1)                                                                                   | 19.4 (< 1)                                                                                    | 0.7              | 0                | 0.6              |

<sup>[a]</sup> Calculated harmonic frequencies and IR intensities (km mol<sup>-1</sup>, in parentheses) at B3LYP/6-311++G(3df,3pd) level. <sup>[b]</sup> B3LYP/6-311++G(3df,3pd) calculated doubly-<sup>18</sup>O-labeled isotopic shifts (cm<sup>-1</sup>) for CH<sub>3</sub><sup>18</sup>O<sub>α</sub>P(<sup>18</sup>O<sub>β</sub>O<sub>γ</sub>). <sup>[c]</sup> B3LYP/6-311++G(3df,3pd) calculated doubly-<sup>18</sup>O-labeled isotopic shifts (cm<sup>-1</sup>) for CH<sub>3</sub><sup>18</sup>O<sub>α</sub>P(O<sub>β</sub><sup>18</sup>O<sub>γ</sub>). <sup>[d]</sup> B3LYP/6-311++G(3df,3pd) calculated doubly-<sup>18</sup>O-labeled isotopic shifts (cm<sup>-1</sup>) for CH<sub>3</sub>O<sub>α</sub>P(<sup>18</sup>O<sub>β</sub><sup>18</sup>O<sub>γ</sub>).

**Table S3.** Computed vertical transitions for CH<sub>3</sub>OPO<sub>2</sub>, acyclic CH<sub>3</sub>P(=O)OO and cyclic CH<sub>3</sub>P(=O)(O<sub>2</sub>) at the TD-B3LYP/6-311++G(3df,3pd) level.

| CH <sub>3</sub> OPO <sub>2</sub> |                                  | <i>cis</i> -CH <sub>3</sub> P(=O)OO |                                  | <i>trans</i> -CH <sub>3</sub> P(=O)OO |                                  | cyclic CH <sub>3</sub> P(=O)(O <sub>2</sub> ) |                                  |
|----------------------------------|----------------------------------|-------------------------------------|----------------------------------|---------------------------------------|----------------------------------|-----------------------------------------------|----------------------------------|
| energy (nm)                      | oscillator strength ( <i>f</i> ) | energy (nm)                         | oscillator strength ( <i>f</i> ) | energy (nm)                           | oscillator strength ( <i>f</i> ) | energy (nm)                                   | oscillator strength ( <i>f</i> ) |
| 217                              | 0.0039                           | 411                                 | 0.0100                           | 456                                   | 0.0001                           | 338                                           | 0.0009                           |
| 202                              | 0.0002                           | 398                                 | 0.0013                           | 429                                   | 0.0200                           | 240                                           | 0.0041                           |
| 188                              | 0.0019                           | 335                                 | 0.1255                           | 394                                   | 0.0009                           | 175                                           | 0.0012                           |
| 188                              | 0.0031                           | 269                                 | 0.0013                           | 347                                   | 0.0347                           | 174                                           | 0.0023                           |
| 180                              | 0.0406                           | 268                                 | 0.0014                           | 288                                   | 0.0015                           | 167                                           | 0.0049                           |
| 165                              | 0.0007                           | 231                                 | 0.0006                           | 273                                   | 0.0009                           | 164                                           | 0.0687                           |
| 161                              | 0.0001                           | 225                                 | 0.0040                           | 213                                   | 0.0034                           | 162                                           | 0.0006                           |
| 156                              | 0.0324                           | 209                                 | 0.0002                           | 210                                   | 0.0006                           |                                               |                                  |
| 153                              | 0.0051                           | 206                                 | 0.0046                           | 203                                   | 0.0075                           |                                               |                                  |
| 148                              | 0.1402                           |                                     |                                  | 197                                   | 0.0052                           |                                               |                                  |

## References

- [1] X. X. Chu, Y. Yang, B. Lu, Z. Wu, W. Y. Qian, C. Song, X. F. Xu, M. Abe and X. Q. Zeng, *J. Am. Chem. Soc.*, 2018, **140**, 13604-13608.
- [2] H. L. Zhang, R. Tsukuhara, G. Tigyi and G. D. Prestwich, *J. Org. Chem.*, 2006, **71**, 6061-6066.
- [3] K. Raghavachari, G. W. Trucks, J. A. Pople and M. Head-Gordon, *Chem. Phys. Lett.*, 1989, **157**, 479-483.
- [4] A. D. Becke, *J. Chem. Phys.*, 1993, **98**, 5648-5652.
- [5] E. D. Glendening, C. R. Landis and F. Weinhold, *J. Comput. Chem.*, 2019, **9999**, 1-8.
- [6] M. J. Frisch, G. W. Trucks, H. B. Schlegel, G. E. Scuseria, M. A. Robb, J. R. Cheeseman, G. Scalmani, V. Barone, B. Mennucci, G. A. Petersson, H. Nakatsuji, M. Caricato, X. Li, H. P. Hratchian, A. F. Izmaylov, J. Bloino, G. Zheng, J. L. Sonnenberg, M. Hada, M. Ehara, K. Toyota, R. Fukuda, J. Hasegawa, M. Ishida, T. Nakajima, Y. Honda, O. Kitao, H. Nakai, T. Vreven, J. A. Montgomery, Jr., J. E. Peralta, F. Ogliaro, M. Bearpark, J. J. Heyd, E. Brothers, K. N. Kudin, V. N. Staroverov, R. Kobayashi, J. Normand, K. Raghavachari, A. Rendell, J. C. Burant, S. S. Iyengar, J. Tomasi, M. Cossi, N. Rega, J. M. Millam, M. Klene, J. E. Knox, J. B. Cross, V. Bakken, C. Adamo, J. Jaramillo, R. Gomperts, R. E. Stratmann, O. Yazyev, A. J. Austin, R. Cammi, C. Pomelli, J. W. Ochterski, R. L. Martin, K. Morokuma, V. G. Zakrzewski, G. A. Voth, P. Salvador, J. J. Dannenberg, S. Dapprich, A. D. Daniels, Ö. Farkas, J. B. Foresman, J. V. Ortiz, J. Cioslowski and D. J. Fox, *Gaussian 09, A.01*, Gaussian, Inc., Wallingford CT, 2009.

**Computed atomic coordinates (in Angstroms) and energies (in Hartrees) for all optimized structures.**

**CH<sub>3</sub>OPO<sub>2</sub>**

B3LYP/6-311++G(3df, 3pd)

|                                              |             |             |             |
|----------------------------------------------|-------------|-------------|-------------|
| O                                            | -0.65626000 | -0.84838200 | 0.00000000  |
| C                                            | 0.11000200  | -2.08088900 | 0.00000000  |
| H                                            | -0.17410900 | -2.63366600 | 0.89071200  |
| H                                            | -0.17410900 | -2.63366600 | -0.89071200 |
| H                                            | 1.17490300  | -1.86900200 | 0.00000000  |
| P                                            | 0.00000000  | 0.57433800  | 0.00000000  |
| O                                            | 1.45822800  | 0.58496000  | 0.00000000  |
| O                                            | -0.98780500 | 1.63924700  | 0.00000000  |
| Zero-point correction=                       |             |             | 0.051199    |
| Thermal correction to Energy=                |             |             | 0.057072    |
| Thermal correction to Enthalpy=              |             |             | 0.058016    |
| Thermal correction to Gibbs Free Energy=     |             |             | 0.020268    |
| Sum of electronic and zero-point Energies=   |             |             | -607.079371 |
| Sum of electronic and thermal Energies=      |             |             | -607.073498 |
| Sum of electronic and thermal Enthalpies=    |             |             | -607.072554 |
| Sum of electronic and thermal Free Energies= |             |             | -607.110302 |

***cis*-CH<sub>3</sub>P(=O)OO**

B3LYP/6-311++G(3df,3pd)

|                                              |             |             |             |
|----------------------------------------------|-------------|-------------|-------------|
| P                                            | -0.32015300 | 0.18041700  | -0.00005000 |
| O                                            | 0.91274300  | -0.72162500 | -0.00004400 |
| O                                            | -0.44095300 | 1.62928500  | 0.00003300  |
| O                                            | 2.22747600  | -0.18510100 | 0.00005000  |
| C                                            | -1.76876400 | -0.87766900 | 0.00003900  |
| H                                            | -1.45358400 | -1.91662400 | -0.00031100 |
| H                                            | -2.36260600 | -0.65228900 | 0.88498300  |
| H                                            | -2.36306800 | -0.65179900 | -0.88446500 |
| Zero-point correction=                       |             |             | 0.046710    |
| Thermal correction to Energy=                |             |             | 0.053232    |
| Thermal correction to Enthalpy=              |             |             | 0.054176    |
| Thermal correction to Gibbs Free Energy=     |             |             | 0.015560    |
| Sum of electronic and zero-point Energies=   |             |             | -606.895270 |
| Sum of electronic and thermal Energies=      |             |             | -606.888748 |
| Sum of electronic and thermal Enthalpies=    |             |             | -606.887804 |
| Sum of electronic and thermal Free Energies= |             |             | -606.926419 |

**trans-CH<sub>3</sub>P(=O)OO**

B3LYP/6-311++G(3df,3pd)

|                                              |             |             |             |
|----------------------------------------------|-------------|-------------|-------------|
| P                                            | -0.46664100 | -0.10906900 | -0.00000300 |
| O                                            | 0.77958300  | -0.98911700 | -0.00001000 |
| O                                            | -1.83182200 | -0.61173300 | 0.00000800  |
| O                                            | 1.99023100  | -0.14970500 | 0.00001000  |
| C                                            | -0.09010200 | 1.63087800  | -0.00000200 |
| H                                            | 0.52969600  | 1.83424600  | 0.87320900  |
| H                                            | 0.52972300  | 1.83424000  | -0.87319600 |
| H                                            | -1.02313700 | 2.18671900  | -0.00001600 |
| Zero-point correction=                       |             |             | 0.046721    |
| Thermal correction to Energy=                |             |             | 0.052993    |
| Thermal correction to Enthalpy=              |             |             | 0.053937    |
| Thermal correction to Gibbs Free Energy=     |             |             | 0.016792    |
| Sum of electronic and zero-point Energies=   |             |             | -606.901366 |
| Sum of electronic and thermal Energies=      |             |             | -606.895095 |
| Sum of electronic and thermal Enthalpies=    |             |             | -606.894151 |
| Sum of electronic and thermal Free Energies= |             |             | -606.931296 |

**cyclic CH<sub>3</sub>P(=O)(O<sub>2</sub>)**

B3LYP/6-311++G(3df,3pd)

|                                              |             |             |             |
|----------------------------------------------|-------------|-------------|-------------|
| O                                            | -0.46574000 | 1.60558600  | 0.00011100  |
| O                                            | 1.17206900  | -0.40060100 | -0.78829500 |
| O                                            | 1.17196100  | -0.40082200 | 0.78826700  |
| P                                            | -0.08753800 | 0.20249600  | -0.00001400 |
| C                                            | -1.43010000 | -0.97743800 | -0.00006900 |
| H                                            | -2.04575500 | -0.80842900 | 0.88221200  |
| H                                            | -2.04722800 | -0.80679400 | -0.88099000 |
| H                                            | -1.03966800 | -1.99089100 | -0.00126500 |
| Zero-point correction=                       |             |             | 0.048859    |
| Thermal correction to Energy=                |             |             | 0.054410    |
| Thermal correction to Enthalpy=              |             |             | 0.055354    |
| Thermal correction to Gibbs Free Energy=     |             |             | 0.019940    |
| Sum of electronic and zero-point Energies=   |             |             | -606.982149 |
| Sum of electronic and thermal Energies=      |             |             | -606.976598 |
| Sum of electronic and thermal Enthalpies=    |             |             | -606.975654 |
| Sum of electronic and thermal Free Energies= |             |             | -607.011068 |

**cyclic CH<sub>3</sub>OPO<sub>2</sub>**

B3LYP/6-311++G(3df,3pd)

|                                              |             |             |             |
|----------------------------------------------|-------------|-------------|-------------|
| P                                            | 0.30915200  | 0.00022600  | 0.54135200  |
| O                                            | -0.91826800 | -0.00030500 | -0.49980600 |
| O                                            | 1.51286800  | -0.76843700 | -0.26238800 |
| O                                            | 1.51273700  | 0.76828000  | -0.26292400 |
| C                                            | -2.27348200 | 0.00002400  | -0.02719000 |
| H                                            | -2.31767300 | 0.00038800  | 1.06343400  |
| H                                            | -2.76870500 | 0.88919900  | -0.41014600 |
| H                                            | -2.76870300 | -0.88942800 | -0.40947900 |
| Zero-point correction=                       |             |             | 0.048943    |
| Thermal correction to Energy=                |             |             | 0.054978    |
| Thermal correction to Enthalpy=              |             |             | 0.055922    |
| Thermal correction to Gibbs Free Energy=     |             |             | 0.018924    |
| Sum of electronic and zero-point Energies=   |             |             | -606.949608 |
| Sum of electronic and thermal Energies=      |             |             | -606.943573 |
| Sum of electronic and thermal Enthalpies=    |             |             | -606.942629 |
| Sum of electronic and thermal Free Energies= |             |             | -606.979627 |

**TS1**

B3LYP/6-311++G(3df,3pd)

|                                              |             |             |             |
|----------------------------------------------|-------------|-------------|-------------|
| O                                            | -0.23659900 | 1.60060300  | -0.02529300 |
| O                                            | 0.81423700  | -0.92622500 | -0.21838700 |
| O                                            | 2.03457200  | -0.14549100 | 0.21522000  |
| P                                            | -0.23946700 | 0.15247100  | -0.07233000 |
| C                                            | -1.81964800 | -0.67152200 | 0.12647800  |
| H                                            | -1.75707600 | -1.67696400 | -0.28151600 |
| H                                            | -2.03724000 | -0.72903100 | 1.19434400  |
| H                                            | -2.59347000 | -0.08303900 | -0.35906000 |
| Zero-point correction=                       |             |             | 0.046432    |
| Thermal correction to Energy=                |             |             | 0.052304    |
| Thermal correction to Enthalpy=              |             |             | 0.053248    |
| Thermal correction to Gibbs Free Energy=     |             |             | 0.016632    |
| Sum of electronic and zero-point Energies=   |             |             | -606.891069 |
| Sum of electronic and thermal Energies=      |             |             | -606.885197 |
| Sum of electronic and thermal Enthalpies=    |             |             | -606.884253 |
| Sum of electronic and thermal Free Energies= |             |             | -606.920869 |

**TS2**

B3LYP/6-311++G(3df,3pd)

|                                              |             |             |             |
|----------------------------------------------|-------------|-------------|-------------|
| P                                            | 0.10971000  | -0.08524200 | -0.33114500 |
| O                                            | -0.74073600 | -1.03230200 | 0.49863500  |
| O                                            | 1.12258500  | 0.88891200  | 0.51325200  |
| O                                            | 1.72509600  | -0.31729500 | -0.24643700 |
| C                                            | -1.98471500 | 0.51186000  | -0.12443100 |
| H                                            | -2.37250100 | 0.16564600  | -1.06856900 |
| H                                            | -2.50616400 | 0.16635900  | 0.75291400  |
| H                                            | -1.71425200 | 1.56094200  | -0.09418200 |
| Zero-point correction=                       |             |             | 0.046139    |
| Thermal correction to Energy=                |             |             | 0.051856    |
| Thermal correction to Enthalpy=              |             |             | 0.052800    |
| Thermal correction to Gibbs Free Energy=     |             |             | 0.016802    |
| Sum of electronic and zero-point Energies=   |             |             | -606.861660 |
| Sum of electronic and thermal Energies=      |             |             | -606.855943 |
| Sum of electronic and thermal Enthalpies=    |             |             | -606.854999 |
| Sum of electronic and thermal Free Energies= |             |             | -606.890997 |

**TS3**

B3LYP/6-311++G(3df,3pd)

|                                              |             |             |             |
|----------------------------------------------|-------------|-------------|-------------|
| P                                            | 0.39090400  | -0.07829800 | 0.41545000  |
| O                                            | -0.93870100 | 0.36208100  | -0.37910900 |
| O                                            | 1.36314900  | -1.01513500 | -0.30952400 |
| O                                            | 1.48762900  | 0.96622200  | -0.12669500 |
| C                                            | -2.24170500 | -0.11053600 | 0.00435500  |
| H                                            | -2.19625800 | -0.72245400 | 0.90526500  |
| H                                            | -2.87578200 | 0.75448100  | 0.17912300  |
| H                                            | -2.63790600 | -0.69968100 | -0.81964000 |
| Zero-point correction=                       |             |             | 0.047567    |
| Thermal correction to Energy=                |             |             | 0.053452    |
| Thermal correction to Enthalpy=              |             |             | 0.054397    |
| Thermal correction to Gibbs Free Energy=     |             |             | 0.017559    |
| Sum of electronic and zero-point Energies=   |             |             | -606.910190 |
| Sum of electronic and thermal Energies=      |             |             | -606.904305 |
| Sum of electronic and thermal Enthalpies=    |             |             | -606.903360 |
| Sum of electronic and thermal Free Energies= |             |             | -606.940198 |

**TS4**

B3LYP/6-311++G(3df,3pd)

|                                              |             |             |             |
|----------------------------------------------|-------------|-------------|-------------|
| O                                            | 0.30456500  | -1.23110100 | 0.00666000  |
| C                                            | 2.12223400  | -0.00000200 | -0.00747000 |
| H                                            | 2.33732000  | -0.92001100 | -0.51996400 |
| H                                            | 2.33734800  | 0.92027900  | -0.51945700 |
| H                                            | 2.19387900  | -0.00030700 | 1.06629100  |
| P                                            | -0.55693400 | 0.00000200  | -0.00117600 |
| O                                            | 0.30453300  | 1.23112400  | 0.00665900  |
| O                                            | -2.01509100 | -0.00002000 | -0.00887100 |
| Zero-point correction=                       |             |             | 0.047970    |
| Thermal correction to Energy=                |             |             | 0.053590    |
| Thermal correction to Enthalpy=              |             |             | 0.054534    |
| Thermal correction to Gibbs Free Energy=     |             |             | 0.018375    |
| Sum of electronic and zero-point Energies=   |             |             | -606.992839 |
| Sum of electronic and thermal Energies=      |             |             | -606.987218 |
| Sum of electronic and thermal Enthalpies=    |             |             | -606.986274 |
| Sum of electronic and thermal Free Energies= |             |             | -607.022434 |
